# Supplementary material
Source: PubMed Central journal article supplement (PMC2610506)
Supplement: M805390200_1.pdf [file M805390200_1.pdf]

# Supplemental Data

## **Dissection of the Stepwise Mechanism to $\beta$ -Lactam Formation and Elucidation of a Rate-Determining Conformational Change in $\beta$ -Lactam Synthetase**

Mary L. Raber<sup>1</sup>, Michael F. Freeman<sup>2</sup>, Craig A. Townsend<sup>1</sup>  
From Department of Chemistry<sup>1</sup> and Department of  
Biology<sup>2</sup>

*Johns Hopkins University, Baltimore, MD 21218*

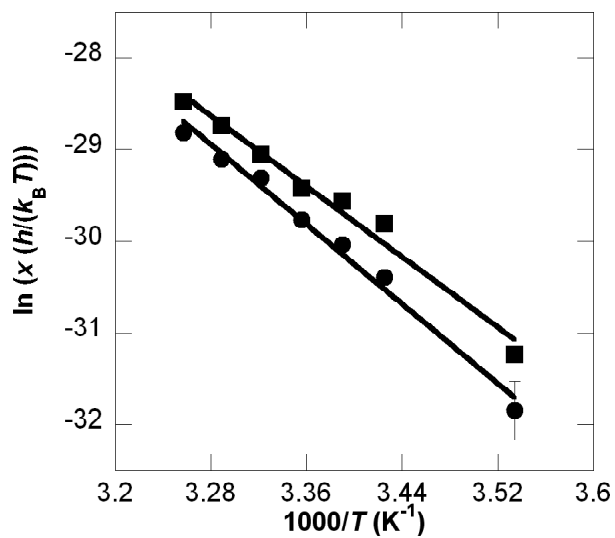

**S. Fig. 1** Eyring plots representing the temperature dependence of  $k_{cat}$  at pH 8.8 (●) and 9.3 (■). Error bars are shown for all data points and do not exceed the size of the data points when not visible.

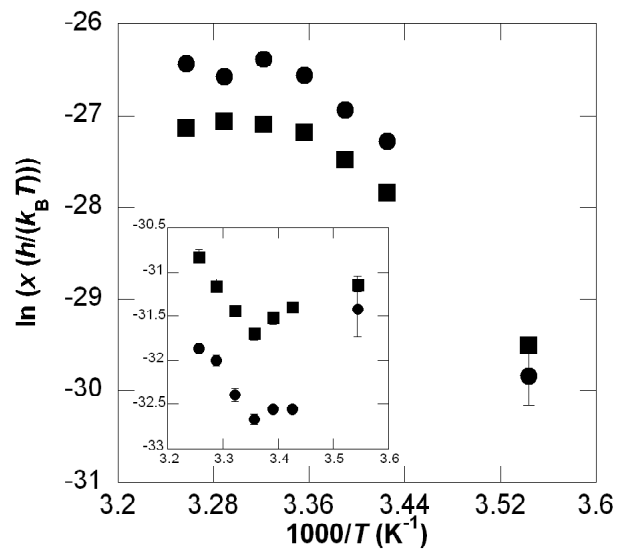

**S. Fig. 2** Eyring plots representing the temperature dependence on  $k_{cat}/K_m$  and  $K_m$  (inset) at pH 8.8 (●) and 9.3 (■). Error bars are shown for all data points and do not exceed the size of the data points when not visible.
